# Supplementary material for: Application of environmental DNA to detect an endangered marine skate species in the wild
Source: PLoS One. 2017 Jun 7;12(6):e0178124. doi: 10.1371/journal.pone.0178124 (PMC5462358; doi:10.1371/journal.pone.0178124)
Supplement: S1 Data — The data consists of the eDNA concentration (copies eDNA molecules per micro-liter) acquired from water samples collected in the field at depth at sample sites Table Head (THD) and Liberty Point (LP). Average eDNA concentrations (copies eDNA molecules per micro-liter) and their corresponding standard deviations were determined for sample volumes of 1 L, 2 L and 4 L, as well as standardizing these to 250ml across all samples. (XLSX) [file pone.0178124.s001.xlsx]

## Sheet: Sheet1
Sample Name	Sample Site	Sample Volume (L)	Sample replicates	eDNA concentration (copies molecules/ul)	copies/ul (x10e-3)	Averae eDNA concentration (copies molecules/ul(x10e-3)	Stad dev. For average eDNA concentration (copies molecules/ul) (x10e-3) (x10e-3)	eDNA concentration Standardized (250ml)(copies molecules/ul)	eDNA concentration Standardized (250ml)(copies molecules/ul)) (x10e-3)	Averae standardized eDNA concentration (copies molecules/ul) (x10e-3)	Stad dev. for standardized (x10e-3)
THD6	THD	1	1	182266	182.266			45566.5	45.5665
THD6	THD	1	1	221109	221.109			55277.2	55.2773
THD6	THD	1	1	221109	221.109			55277.2	55.2773
THD6	THD	1	1	221331	221.331			55332.8	55.3327
THD6	THD	1	1	250580	250.58			62645	62.645
THD6	THD	1	1	257703	257.703	225.683	26.7991	64425.8	64.4257	56.4207	6.69978
THD8	THD	2	1	359290	359.29			44911.2	44.9113
THD8	THD	2	1	428504	428.504			53563	53.563
THD8	THD	2	1	485132	485.132			60641.5	60.6415
THD8	THD	2	1	498921	498.921			62365.1	62.3651
THD8	THD	2	1	507483	507.483			63435.4	63.4354
THD8	THD	2	1	572826	572.826	475.359	73.2801	71603.2	71.6033	59.4199	9.16001
THD12	THD	4	1	11820	11.82			738.75	0.73875
THD12	THD	4	1	12767	12.767			797.938	0.797937
THD12	THD	4	1	13999	13.999			874.938	0.874938
THD12	THD	4	1	13999	13.999			874.938	0.874938
THD12	THD	4	1	15597	15.597	13.6364	1.42847	974.812	0.974812	0.852275	0.0892792
THD1	THD	1	2	2574	2.574			643.5	0.6435
THD1	THD	1	2	4103	4.103			1025.75	1.02575
THD1	THD	1	2	5207	5.207			1301.75	1.30175
THD1	THD	1	2	5518	5.518			1379.5	1.3795
THD1	THD	1	2	8089	8.089	5.0982	2.0307	2022.25	2.02225	1.27455	0.507675
THD2	THD	2	2	5966	5.966			745.75	0.74575
THD2	THD	2	2	7740	7.74			967.5	0.9675
THD2	THD	2	2	7992	7.992			999	0.999
THD2	THD	2	2	9030	9.03			1128.75	1.12875
THD2	THD	2	2	10285	10.285			1285.62	1.28563
THD2	THD	2	2	12120	12.12	8.8555	2.14803	1515	1.515	1.10694	0.268503
LP3	LP	1	1	24723	24.723			6180.75	6.18075
LP3	LP	1	1	43292	43.292			10823	10.823
LP3	LP	1	1	49677	49.677			12419.2	12.4192
LP3	LP	1	1	52424	52.424			13106	13.106
LP3	LP	1	1	63041	63.041			15760.2	15.7602
LP3	LP	1	1	73281	73.281	51.073	16.7037	18320.2	18.3203	12.7683	4.17593
LP1	LP	2	1	201363	201.363			25170.4	25.1704
LP1	LP	2	1	247758	247.758			30969.8	30.9698
LP1	LP	2	1	250739	250.739			31342.4	31.3424
LP1	LP	2	1	286572	286.572			35821.5	35.8215
LP1	LP	2	1	466588	466.588			58323.5	58.3235
LP1	LP	1	1	727084	727.084	363.351	200.568	181771	181.771	60.5664	60.4827
LP5	LP	4	1	473617	473.617			29601.1	29.6011
LP5	LP	4	1	520143	520.143			32508.9	32.5089
LP5	LP	4	1	574665	574.665			35916.6	35.9166
LP5	LP	4	1	586822	586.822			36676.4	36.6764
LP5	LP	4	1	656136	656.136	562.277	69.2844	41008.5	41.0085	35.1423	4.33027
LP10	LP	1	2	71052	71.052			17763	17.763
LP10	LP	1	2	80160	80.16			20040	20.04
LP10	LP	1	2	81286	81.286			20321.5	20.3215
LP10	LP	1	2	83921	83.921			20980.2	20.9803
LP10	LP	1	2	86814	86.814			21703.5	21.7035
LP10	LP	1	2	120630	120.63	87.3105	17.1679	30157.5	30.1575	21.8276	4.29198
LP11	LP	2	2	309126	309.126			38640.8	38.6407
LP11	LP	2	2	416052	416.052			52006.5	52.0065
LP11	LP	2	2	474562	474.562			59320.2	59.3203
LP11	LP	2	2	483154	483.154			60394.2	60.3942
LP11	LP	2	2	523785	523.785	441.336	83.3206	65473.1	65.4731	55.167	10.4151
LP8	LP	4	2	1160449	1160.45			72528.1	72.5281
LP8	LP	4	2	1384375	1384.38			86523.4	86.5234
LP8	LP	4	2	2017896	2017.9			126118	126.118
LP8	LP	4	2	2306273	2306.27	1717.25	534.842	144142	144.142	107.328	33.4277
